## CORRECTION

# Correction: Partners' experiences of their loved ones' trauma and PTSD: An ongoing journey of loss and gain

Rosie Powling, Dora Brown, Sahra Tekin, Jo Billings

## Notice of Republication

An incorrect version of 'Response to Reviewers' file was published in error. This article was republished on May 6, 2024, to correct this error. Please download this article again to view the correct version.

## Reference

1. Powling R, Brown D, Tekin S, Billings J (2024) Partners' experiences of their loved ones' trauma and PTSD: An ongoing journey of loss and gain. PLoS ONE 19(2): e0292315. <https://doi.org/10.1371/journal.pone.0292315>. PMID: [38354114](https://pubmed.ncbi.nlm.nih.gov/38354114/)

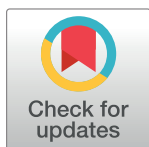

## OPEN ACCESS

**Citation:** Powling R, Brown D, Tekin S, Billings J (2024) Correction: Partners' experiences of their loved ones' trauma and PTSD: An ongoing journey of loss and gain. PLoS ONE 19(5): e0304167. <https://doi.org/10.1371/journal.pone.0304167>

**Published:** May 17, 2024

**Copyright:** © 2024 Powling et al. This is an open access article distributed under the terms of the [Creative Commons Attribution License](https://creativecommons.org/licenses/by/4.0/), which permits unrestricted use, distribution, and reproduction in any medium, provided the original author and source are credited.
